# Supplementary material
Source: publisher figshare collection journal article supplement (https://diabetesjournals.figshare.com/ndownloader/files/22670462)
Supplement: Supplementary file 1 [file 22670462]

*Diabetes Care*

Online-Only Supplementary Material

**Clinical characteristics and outcomes of patients with diabetes and COVID-19**

**in association with glucose-lowering medication**

*Running Title: Features of patients with diabetes and COVID-19*

Yuchen Chen1*, Dong Yang1*, Biao Cheng2*, Jian Chen2, Anlin Peng3, Chen Yang1, Chong Liu4, Mingrui Xiong1, Aiping Deng2, Yu Zhang1, Ling Zheng4†, Kun Huang1†

1Tongji School of Pharmacy, Tongji Medical College, Huazhong University of Science and Technology, Wuhan, China, 430030

2Department of Pharmacy and the Center of Information, The Central Hospital of Wuhan, Tongji Medical College, Huazhong University of Science and Technology, Wuhan, Hubei, China, 430021

3Department of Pharmacy, The Third Hospital of Wuhan, Wuhan, China, 430060

4Hubei Key Laboratory of Cell Homeostasis, College of Life Sciences, Wuhan University, Wuhan, China, 430072

*Equal contribution

†*Corresponding Authors*

Dr. Kun Huang, Tongji School of Pharmacy, Huazhong University of Science and Technology, Wuhan, China, 430030, Tel/Fax: +86-027-83692921, E-mail: kunhuang@hust.edu.cn

Dr. Ling Zheng, College of Life Sciences, Wuhan University, Wuhan, China, 430072, Tel/Fax: +86-027-68755559, E-mail: lzheng@whu.edu.cn

This appendix presents 7 supplementary tables cited in the text of the main manuscript

**Supplementary Table** 1. Reference values and number of participants for laboratory tests

| Laboratory tests | Reference values | No. of patients tested |
| --- | --- | --- |
| White blood cells, ×109/L | 3.50-9.50 | 896 |
| Neutrophils, ×109/L | 1.80-6.30 | 896 |
| Lymphocytes, ×109/L | 1.10-3.20 | 896 |
| Monocytes, ×109/L | 0.10-0.60 | 896 |
| Platelets, ×109/L | 125.00-350.00 | 896 |
| Hemoglobin, g/L | 115.00-150.00 | 896 |
| Albumin, g/L | 40.00-55.00 | 890 |
| ALT, U/L | 9.00-50.00 (male), 7.00-40.00 (female) | 890 |
| AST, U/L | 0.00-45.00 | 895 |
| Total bilirubin, μmol/L | 2.00-21.00 | 890 |
| Urea, mmol/L | 3.10-7.20 | 894 |
| Creatinine, μmol/L | 40.00-105.00 | 894 |
| Creatine kinase, U/L | 30.00-180.00 | 773 |
| LDH, U/L | 114.00-240.00 | 773 |
| Glucose, mmol/L | 3.90-6.10 | 895 |
| HbA1c, % | 4.00%-6.50% | 92 |
| HbA1c, mmol/mol | 20.00-48.00 |
| IL-6, pg/mL | 0.00-7.00 | 290 |
| ESR, mm/h | 0.00-15.00 (male), 0.00-20.00 (female) | 386 |
| Procalcitonin, ng/mL | 0.00-0.05 | 800 |
| CRP, mg/dL | 0.00-0.50 | 875 |
| APTT, s | 21.00-35.00 | 851 |
| PT, s | 10.00-13.00 | 851 |
| D-dimer, mg/L | 0.00-0.50 | 869 |

Abbreviations: ALT, Alanine aminotransferase; AST, Aspartate aminotransferase; LDH, Lactate dehydrogenase; IL-6, Interleukin-6; CRP, C-reactive protein; ESR, Erythrocyte sedimentation rate; APTT, Activated partial thromboplastin time; PT, Prothrombin time.

**Supplementary Table 2. Clinical characteristics, outcomes and laboratory findings with gender** subgroups

|  | Confirmed COVID-19 | | | | | |
| --- | --- | --- | --- | --- | --- | --- |
| Male | | | Female | | |
| Non-Diabetes | Diabetes | *P* value* | Non-Diabetes | Diabetes | *P* value* |
| *Baseline characteristics and clinical outcomes* | | | | | | |
| No. of Patients | 162 | 21 |  | 130 | 28 |  |
| Age, years | 57.0 (40.8-69.0) | 67.0 (63.5-75.5) | 0.001 | 55.5 (34.8-66.3) | 65.0 (56.3-73.8) | <0.001 |
| Hospital Stay, days | 19.0 (10.0-26.0) | 28.0 (19.5-45.0) | 0.002 | 20.0 (13.8-25.3) | 24.0 (18.3-33.0) | 0.012 |
| In hospital death | 32 (19.75%) | 7 (33.33%) | 0.163 | 10 (7.68%) | 5 (17.86%) | 0.146 |
| Poor prognosis | 103 (63.58%) | 19 (90.48%) | 0.013 | 65 (50.00%) | 19 (67.86%) | 0.098 |
| *Initial common symptoms* | | | | | | |
| Fever (temperature>37.3℃) | 110 (67.90%) | 14 (66.67%) | 1.000 | 82 (63.08%) | 10 (35.71%) | 0.011 |
| Cough | 74 (45.68%) | 11 (52.38%) | 0.645 | 69 (53.08%) | 16 (57.14%) | 0.835 |
| Fatigue | 29 (17.90%) | 4 (19.05%) | 1.000 | 32 (24.62%) | 6 (21.43%) | 0.812 |
| Comorbidities | | | | | | |
| Hypertension | 53 (32.72%) | 15 (71.43%) | 0.001 | 42 (32.31%) | 15 (53.57%) | 0.050 |
| Cardiovascular disease | 25 (15.43%) | 7 (33.33%) | 0.062 | 14 (10.77%) | 4 (14.29%) | 0.529 |
| Nervous system disease | 13 (8.02%) | 3 (14.29%) | 0.402 | 6 (4.62%) | 5 (17.86%) | 0.026 |
| Chronic kidney disease | 13 (8.02%) | 4 (19.05%) | 0.112 | 6 (4.62%) | 1 (3.57%) | 1.000 |
| Chronic lung disease | 8 (4.94%) | 1 (4.76%) | 1.000 | 5 (3.85%) | 1 (3.57%) | 1.000 |
| Tumor | 8 (4.94%) | 1 (4.76%) | 1.000 | 2 (1.54%) | 0 (0.00%) | 1.000 |
| *Laboratory findings* | | | | | | |
| *Hematologic, ×109/L* | | | | | | |
| White blood cells | 5.09 (3.90-6.77) | 5.48 (3.73-7.16) | 0.687 | 4.75 (3.63-6.12) | 6.06 (4.94-8.12) | 0.004 |
| Neutrophils | 3.36 (2.34-4.93) | 4.40 (2.66-5.75) | 0.197 | 2.94 (2.00-4.54) | 4.39 (3.03-6.74) | 0.001 |
| Lymphocytes | 1.03 (0.69-1.43) | 0.83 (0.61-0.96) | 0.007 | 1.17 (0.84-1.55) | 1.00 (0.67-1.52) | 0.460 |
| Monocytes | 0.35 (0.27-0.49) | 0.33 (0.26-0.53) | 0.887 | 0.33 (0.22-0.44) | 0.32 (0.19-0.57) | 0.849 |
| Platelets | 165.00 (116.00-209.00) | 141.00 (131.50-195.00) | 0.698 | 191.00 (155.00-247.00) | 186.00 (164.00-238.00) | 0.860 |
| *Biochemical* | | | | | | |
| Hemoglobin, g/L | 139.00 (128.00-146.00) | 132.00 (113.50-143.00) | 0.049 | 125.00 (114.50-133.00) | 120.00 (112.00-129.25) | 0.251 |
| Albumin, g/L | 38.60 (35.15-43.20) | 36.20 (31.80-39.95) | 0.033 | 40.50 (36.55-43.55) | 36.40 (34.23-39.35) | 0.001 |
| Total bilirubin, μmol/L | 10.30 (7.80-14.43) | 9.70 (6.20-17.00) | 0.821 | 8.90 (6.90-10.85) | 9.75 (7.08-13.48) | 0.241 |
| ALT, U/L | 24.50 (14.98-41.75) | 19.70 (17.05-25.50) | 0.188 | 16.70 (12.05-25.05) | 16.15 (11.78-30.33) | 0.869 |
| AST, U/L | 28.10 (18.75-39.20) | 25.60 (17.90-39.00) | 0.610 | 19.30 (15.45-25.95) | 18.85 (14.83-25.40) | 0.690 |
| LDH, U/L | 206.00 (157.00-281.50) | 200.50 (167.50-344.25) | 0.594 | 168.00 (143.00-218.00) | 195.00 (178.00-255.00) | 0.028 |
| Urea, mmol/L | 4.70 (3.80-6.21) | 7.90 (5.00-12.10) | <0.001 | 3.30 (2.80-4.41) | 4.14 (3.29-5.21) | 0.023 |
| Creatinine, μmol/L | 75.30 (65.60-87.30) | 91.30 (71.95-126.85) | 0.010 | 53.50 (46.25-66.60) | 56.50 (44.23-69.95) | 0.719 |
| Creatine kinase, U/L | 106.00 (63.00-217.50) | 91.60 (52.50-176.75) | 0.420 | 74.00 (43.00-117.00) | 61.00 (40.00-152.00) | 0.816 |
| Glucose, mmol/L | 5.54 (4.94-6.69) | 9.80 (7.92-12.19) | <0.001 | 5.12 (4.73-6.04) | 8.37 (6.06-12.55) | <0.001 |
| HbA1c, % | 6.30 (5.80-6.55) | 6.80 (5.95-7.75) | 0.190 | 5.40 (5.30-5.75) | 7.50 (6.90-12.50) | <0.001 |
| HbA1c, mmol/mol | 45.00 (40.00-49.00) | 51.00 (42.00-61.00) | 36.00 (34.00-39.00) | 58.00 (52.00-113.00) |
| *Infection-related indices* | | | | | | |
| CRP, mg/dL | 2.66 (0.50-4.73) | 2.38 (0.21-7.01) | 0.969 | 0.87 (0.11-3.67) | 2.60 (0.46-4.63) | 0.041 |
| IL-6, pg/mL | 9.19 (2.60-40.14) | 10.53 (5.11-60.33) | 0.689 | 3.94 (1.55-11.50) | 7.92 (4.07-34.77) | 0.035 |
| Procalcitonin, ng/mL | 0.08 (0.05-0.13) | 0.17 (0.04-0.37) | 0.265 | 0.04 (0.03-0.06) | 0.06 (0.04-0.08) | 0.057 |
| ESR, mm/h | 36.50 (16.25-58.75) | 52.00 (39.00-78.00) | 0.043 | 41.00 (16.00-59.00) | 37.00 (24.50-58.00) | 0.859 |
| *Coagulation function* | | | | | | |
| APTT, s | 29.35 (26.50-32.68) | 29.60 (26.45-35.85) | 0.442 | 27.80 (24.83-31.30) | 27.60 (23.30-31.30) | 0.369 |
| PT, s | 11.60 (11.00-12.30) | 12.10 (10.85-12.85) | 0.509 | 11.40 (10.70-12.10) | 11.50 (10.90-12.30) | 0.250 |
| D-dimer, mg/L | 0.52 (0.22-1.22) | 0.69 (0.49-1.40) | 0.049 | 0.46 (0.23-1.12) | 0.81 (0.43-2.53) | 0.014 |
|  | Clinically diagnosed COVID-19 | | | | | |
| Male | | | Female | | |
| Non-Diabetes | Diabetes | *P* value* | Non-Diabetes | Diabetes | *P* value* |
| *Baseline characteristics and clinical outcomes* | | | | | | |
| No. of Patients | 195 | 43 |  | 281 | 44 |  |
| Age, years | 52.0 (39.0-66.0) | 62.0 (53.0-72.0) | <0.001 | 47.0 (33.5-61.0) | 67.0 (59.3-73.0) | <0.001 |
| Hospital Stay, days | 16.0 (11.0-23.0) | 20.0 (15.0-26.0) | 0.039 | 15.0 (10.0-22.0) | 19.5 (15.3-31.0) | <0.001 |
| In-hospital death | 13 (6.67%) | 10 (23.26%) | 0.003 | 11 (3.91%) | 4 (9.09%) | 0.130 |
| Poor prognosis | 109 (55.90%) | 32 (74.42%) | 0.027 | 103 (36.65%) | 23 (52.27%) | 0.066 |
| *Initial common symptoms* | | | | | | |
| Fever (temperature≥37.3℃) | 124 (63.59%) | 27 (62.79%) | 1.000 | 180 (64.06%) | 28 (63.64%) | 1.000 |
| Cough | 86 (44.10%) | 20 (46.51%) | 0.866 | 134 (47.69%) | 31 (70.45%) | 0.006 |
| Fatigue | 39 (20.00%) | 14 (32.56%) | 0.103 | 67 (23.84%) | 15 (34.09%) | 0.190 |
| *Comorbidities* | | | | | | |
| Hypertension | 44 (22.56%) | 25 (58.14%) | <0.001 | 50 (17.79%) | 29 (65.91%) | <0.001 |
| Cardiovascular disease | 16 (8,21%) | 12 (27.91%) | 0.001 | 7 (2.39%) | 6 (13.64%) | 0.004 |
| Nervous system disease | 14 (7.18%) | 5 (11.63%) | 0.351 | 1 (0.36%) | 5 (11.36%) | <0.001 |
| Chronic kidney disease | 3 (1.54%) | 9 (20.93%) | <0.001 | 4 (1.42%) | 2 (4.55%) | 0.189 |
| Chronic lung disease | 4 (2.05%) | 0 (0.00%) | 1.000 | 3 (1.07%) | 0 (0.00%) | 1.000 |
| Tumor | 3 (1.54%) | 0 (0.00%) | 1.000 | 4 (1.42%) | 1 (2.27%) | 1.000 |
| *Laboratory findings, value, median (IQR)* | | | | | | |
| *Hematologic, ×109/L* | | | | | | |
| White blood cells | 5.64 (4.34-6.92) | 5.52 (4.83-7.08) | 0.831 | 4.97 (3.97-6.55) | 5.17 (4.45-7.25) | 0.192 |
| Neutrophils | 3.48 (2.63-4.77) | 3.72 (2.98-5.16) | 0.180 | 3.18 (2.19-4.45) | 3.83 (2.63-5.72) | 0.041 |
| Lymphocytes | 1.23 (0.85-1.75) | 1.01 (0.71-1.53) | 0.102 | 1.31 (0.94-1.72) | 1.11 (0.74-1.64) | 0.073 |
| Monocytes | 0.42 (0.32-0.53) | 0.44 (0.29-0.54) | 0.847 | 0.34 (0.25-0.44) | 0.34 (0.24-0.51) | 0.751 |
| Platelets | 197.00 (157.00-252.00) | 183.00 (144.00-238.00) | 0.233 | 210.00 (166.50-257.50) | 193.00 (162.30-233.30) | 0.330 |
| *Biochemical* | | | | | | |
| Hemoglobin, g/L | 139.00 (129.00-149.00) | 127.00 (116.00-139.00) | <0.001 | 123.00 (114.50-130.00) | 119.50 (110.25-125.75) | 0.019 |
| Albumin, g/L | 40.05 (35.88-43.63) | 37.00 (32.70-40.30) | <0.001 | 40.00 (36.63-43.33) | 37.00 (34.20-40.30) | 0.001 |
| Total bilirubin, μmol/L | 10.75 (8.10-14.70) | 8.70 (5.60-11.90) | 0.006 | 8.45 (6.20-12.00) | 9.00 (6.00-14.20) | 0.508 |
| ALT, U/L | 29.00 (17.08-39.85) | 25.70 (15.10-42.40) | 0.414 | 16.95 (11.95-24.93) | 15.80 (11.00-24.60) | 0.580 |
| AST, U/L | 23.30 (17.68-32.85) | 25.00 (16.40-35.50) | 0.639 | 18.30 (15.00-24.65) | 18.50 (13.20-26.70) | 0.787 |
| LDH, U/L | 183.00 (150.00-225.00) | 181.00 (152.00-253.00) | 0.509 | 159.00 (134.50-212.00) | 199.00 (157.00-317.00) | 0.001 |
| Urea, mmol/L | 4.37 (3.44-5.46) | 6.20 (4.29-10.10) | <0.001 | 3.61 (2.90-4.71) | 4.66 (3.61-6.02) | 0.003 |
| Creatinine, μmol/L | 71.85 (62.85-87.75) | 77.50 (61.60-151.20) | 0.088 | 52.85 (46.13-67.68) | 60.55 (51.15-71.60) | 0.074 |
| Creatine kinase, U/L | 73.20 (52.00-125.00) | 100.00 (63.00-152.90) | 0.112 | 53.00 (36.00-76.00) | 70.00 (37.00-121.00) | 0.070 |
| Glucose, mmol/L | 5.24 (4.70-6.07) | 9.01 (6.58-11.97) | <0.001 | 5.05 (4.58-5.88) | 8.71 (5.49-12.20) | <0.001 |
| HbA1c, % | 5.90 (5.70-6.70) | 7.90 (7.10-10.20) | <0.001 | 5.85 (5.63-6.18) | 8.50 (7.35-9.43) | <0.001 |
| HbA1c, mmol/mol | 41.00 (39.00-43.00) | 63.00 (54.00-88.00) | 40.00 (38.00-44.00) | 69.00 (57.00-80.00) |
| *Infection-related indices* | | | | | | |
| CRP, mg/dL | 0.91 (0.15-3.28) | 3.47 (0.95-6.19) | <0.001 | 0.32 (0.06-2.24) | 2.05 (0.46-4.01) | <0.001 |
| IL-6, pg/mL | 3.13 (1.50-10.81) | 12.98 (2.97-66.67) | 0.030 | 2.84 (1.81-5.93) | 4.13 (2.60-10.41) | 0.122 |
| Procalcitonin, ng/mL | 0.06 (0.04-0.10) | 0.08 (0.05-0.16) | 0.005 | 0.04 (0.04-0.06) | 0.06 (0.04-0.11) | <0.001 |
| ESR, mm/h | 24.00 (12.00-43.00) | 63.00 (24.00-90.00) | 0.001 | 26.00 (14.00-54.50) | 59.00 (22.00-78.00) | 0.003 |
| *Coagulation function* | | | | | | |
| APTT, s | 28.00 (24.98-31.00) | 28.75 (24.78-33.65) | 0.473 | 27.70 (24.70-31.30) | 26.20 (23.30-28.90) | 0.038 |
| PT, s | 11.60 (11.10-12.20) | 11.85 (11.30-12.73) | 0.067 | 11.40 (10.90-11.80) | 11.30 (10.80-11.90) | 0.644 |
| D-dimer, mg/L | 0.53 (0.25-1.11) | 0.79 (0.38-1.69) | 0.049 | 0.49 (0.23-1.31) | 1.07 (0.43-2.49) | 0.001 |

Data were n (%) or median (IQR). Data were collected on admission, except for clinical outcomes. *Diabetic cases versus non-diabetic cases with same sex and same diagnosis of COVID-19. Abbreviations: ALT, Alanine aminotransferase; AST, Aspartate aminotransferase; LDH, Lactate dehydrogenase; IL-6, Interleukin-6; CRP, C-reactive protein; ESR, Erythrocyte sedimentation rate; APTT, Activated partial thromboplastin time; PT, Prothrombin time.

**Supplementary Table 3. Univariable and multivariable logistic regression for risk factors associated with in-hospital death and poor prognosis in n**on-diabetic cases with COVID-19

|  | Risk factors associated with in-hospital death | | Risk factors associated with poor prognosis* | |
| --- | --- | --- | --- | --- |
| Univariable OR (95% CI) | *P* value | Univariable OR (95% CI) | *P* value |
| *Non-diabetic cases with COVID-19* | | | | |
| Age, years | 1.10 (1.08, 1.13) | <0.001 | 1.04 (1.03, 1.04) | <0.001 |
| Sex, Female vs Male | 0.37 (0.22, 0.64) | <0.001 | 0.47 (0.35, 0.63) | <0.001 |
| Hypertension | 4.02 (2.40, 6.73) | <0.001 | 2.56 (1.81, 3.61) | <0.001 |
| Cardiovascular disease | 9.99 (5.49, 18.17) | <0.001 | 3.20 (1.78, 5.76) | <0.001 |
| Chronic kidney disease | 22.14 (9.55, 51.33) | <0.001 | 5.90 (2.01, 17.29) | 0.001 |
| Chronic lung disease | 4.91 (1.82, 13.25) | 0.002 | 2.44 (0.93, 6.41) | 0.071 |
| Nervous system disease | 21.37 (10.14, 45.02) | <0.001 | 6.33 (2.42, 16.53) | <0.001 |
| White blood cells, ×109/L | 1.12 (1.05, 1.20) | 0.001 | 1.10 (1.04, 1.16) | 0.001 |
| Neutrophils, ×109/L | 1.23 (1.15, 1.39) | <0.001 | 1.16 (1.09, 1.24) | <0.001 |
| Lymphocytes, ×109/L | 0.19 (0.11, 0.34) | <0.001 | 0.43 (0.33, 0.56) | <0.001 |
| Albumin, g/L | 0.79 (0.75, 0.84) | <0.001 | 0.92 (0.89, 0.94) | <0.001 |
| ALT, U/L | 1.00 (1.00, 1.01) | 0.106 | 1.00 (1.00, 1.01) | 0.315 |
| AST, U/L | 1.01 (1.00, 1.02) | 0.022 | 1.02 (1.01, 1.02) | <0.001 |
| LDH, U/L | 1.00 (1.00, 1.01) | <0.001 | 1.01 (1.01, 1.01) | <0.001 |
| Urea, mmol/L | 1.21 (1.13, 1.29) | <0.001 | 1.10 (1.04, 1.16) | 0.001 |
| Creatinine, μmol/L | 1.00 (1.00, 1.00) | <0.001 | 1.00 (1.00, 1.01) | 0.040 |
| Creatine kinase, U/L | 1.00 (1.00, 1.00) | 0.014 | 1.00 (1.00, 1.00) | 0.056 |
| Glucose, mmol/L | 1.40 (1.23, 1.60) | <0.001 | 1.31 (1.17, 1.46) | <0.001 |
| CRP, mg/dL | 1.25 (1.18, 1.32) | <0.001 | 1.31 (1.22, 1.40) | <0.001 |
| D-dimer, mg/L | 1.04 (1.01, 1.06) | 0.002 | 1.13 (1.05, 1.20) | 0.001 |
|  | Multivariable OR (95% CI) | *P* value | Multivariable OR (95% CI) | *P* value |
| Age, years | 1.09 (1.06, 1.12) | <0.001 | 1.02 (1.01, 1.03) | <0.001 |
| Albumin, g/L | 0.90 (0.83, 0.98) | 0.011 | 1.00 (0.96, 1.04) | 0.995 |
| Creatinine, μmol/L | 1.00 (1.00, 1.00) | 0.001 | 1.00 (1.00, 1.01) | 0.162 |
| CRP, mg/dL | 1.13 (1.05, 1.22) | 0.001 | 1.23 (1.14, 1.32) | <0.001 |
| Glucose, mmol/L | 1.19 (1.01, 1.41) | 0.040 | 1.07 (0.95, 1.20) | 0.289 |

Data were odds ratio (95% confidence intervals). 66 COVID-19 patients without diabetes underwent in-hospital death. 380 COVID-19 patients without diabetes underwent poor prognosis. Laboratory findings tested in no more than half of the total cases were not included in regression models to avoid possible bias. *Poor prognosis included progression to severe or critical illness grading, and in-hospital death. *P* < 0.05 were considered significant. Abbreviations: OR, Odds ratio; CI, Confidence interval; ALT, Alanine aminotransferase; AST, Aspartate aminotransferase; LDH, Lactate dehydrogenase; IL-6, Interleukin-6; CRP, C-reactive protein; APTT, Activated partial thromboplastin time; PT, Prothrombin time.

**Supplementary Table 4. Clinical characteristics, outcomes and laboratory findings according to subgroups (Confirmed COVID-19 and Clinically diagnosed COVID-19) of medication of metformin and insulin**

|  | Confirmed COVID-19 | |  | Clinically diagnosed COVID-19 | |  |
| --- | --- | --- | --- | --- | --- | --- |
|  | Metformin | Non-Metformin | *P* value* | Metformin | Non-Metformin | *P* value* |
| *Baseline characteristics and clinical outcomes* | | | | | | |
| No. of Patients | 22 | 23 |  | 21 | 54 |  |
| Age, years | 65.5 (60.3-73.3) | 67.0 (57.0-73.0) | 0.708 | 62.0 (51.5-65.5) | 67.0 (57.8-73.0) | 0.022 |
| Hospital Stay, days | 27.5 (19.8-41.3) | 25.0 (19.0-37.0) | 0.617 | 17.0 (12.5-24.5) | 21.5 (16.0-30.3) | 0.188 |
| In-hospital death | 4 (18.18%) | 6 (26.09%) | 0.772 | 0 (0.00%) | 9 (16.67%) | 0.054 |
| Poor prognosis | 20 (90.91%) | 14 (60.87%) | 0.035 | 10 (47.62%) | 36 (66.67%) | 0.187 |
| *Laboratory findings* | | | | | | |
| *Hematologic, ×109/L* | | | | | | |
| White blood cells | 5.56 (3.57-7.02) | 6.10 (4.26-7.57) | 0.238 | 5.40 (4.64-7.23) | 5.15 (4.53-7.24) | 0.591 |
| Neutrophils | 4.19 (2.50-5.78) | 4.29 (3.20-5.83) | 0.302 | 3.65 (2.88-5.47) | 3.77 (2.79-5.21) | 0.967 |
| Lymphocytes | 0.78 (0.61-1.14) | 0.94 (0.69-1.45) | 0.173 | 1.15 (0.91-1.60) | 1.00 (0.64-1.55) | 0.302 |
| Monocytes | 0.27 (0.18-0.42) | 0.38 (0.26-0.70) | 0.058 | 0.36 (0.26-0.53) | 0.40 (0.27-0.53) | 0.823 |
| Platelets | 173.00 (132.75-209.25) | 178.00 (152.00-222.00) | 0.460 | 224.00 (163.50-252.50) | 183.00 (145.50-242.75) | 0.291 |
| *Biochemical* | | | | | | |
| Hemoglobin, g/L | 125.00 (111.25-140.00) | 123.00 (112.00-133.00) | 0.540 | 124.00 (113.00-140.50) | 123.50 (111.00-130.50) | 0.471 |
| Albumin, g/L | 38.65 (34.35-41.18) | 35.10 (31.10-38.70) | 0.075 | 38.30 (35.05-42.65) | 37.05 (33.38-40.13) | 0.150 |
| Total bilirubin, μmol/L | 9.60 (8.20-13.28) | 9.60 (6.20-15.00) | 0.937 | 10.50 (8.60-14.35) | 8.45 (5.53-12.55) | 0.135 |
| ALT, U/L | 19.30 (15.25-29.98) | 15.40 (12.00-23.50) | 0.166 | 22.70 (12.50-27.00) | 20.50 (12.83-37.20) | 0.710 |
| AST, U/L | 20.45 (16.83-33.88) | 21.70 (14.80-31.60) | 0.982 | 18.00 (12.85-36.00) | 23.80 (15.58-32.43) | 0.468 |
| LDH, U/L | 190.50 (172.50-244.50) | 208.00 (177.50-273.50) | 0.319 | 185.00 (150.25-240.00) | 198.50 (160.00-262.75) | 0.469 |
| Urea, mmol/L | 4.76 (3.77-7.08) | 5.05 (3.58-8.00) | 0.991 | 4.10 (3.32-5.22) | 5.99 (4.11-8.32) | 0.005 |
| Creatinine, μmol/L | 70.20 (47.48-89.65) | 68.60 (49.60-105.40) | 0.991 | 66.20 (53.70-74.80) | 70.80 (56.10-96.05) | 0.166 |
| Creatine kinase, U/L | 81.00 (47.75-113.50) | 93.00 (48.95-186.50) | 0.302 | 67.50 (35.50-123.00) | 74.00 (52.75-127.50) | 0.411 |
| Glucose, mmol/L | 9.96 (7.99-12.77) | 8.93 (5.96-11.32) | 0.323 | 8.67 (6.49-10.96) | 9.99 (6.95-13.49) | 0.275 |
| HbA1c, % | 7.00 (6.28-7.93) | 10.35 (6.98-12.63) | 0.108 | 8.80 (7.60-10.10) | 8.40 (7.40-9.80) | 0.576 |
| HbA1c, mmol/mol | 53.00 (45.00-63.00) | 90.00 (53.00-114.00) | 73.00 (60.00-87.00) | 68.00 (57.00-84.00) |
| *Infection-related indices* | | | | | | |
| CRP, mg/dL | 2.34 (0.27-4.34) | 2.63 (0.40-6.11) | 0.638 | 0.55 (0.09-4.33) | 2.97 (0.78-5.43) | 0.082 |
| IL-6, pg/mL | 4.77 (2.84-15.99) | 11.10 (8.47-339.25) | 0.024 | 3.30 (1.83-4.13) | 9.32 (3.00-49.60) | 0.089 |
| Procalcitonin, ng/mL | 0.06 (0.04-0.14) | 0.10 (0.04-0.22) | 0.634 | 0.06 (0.04-0.09) | 0.08 (0.05-0.15) | 0.065 |
| ESR, mm/h | 39.00 (21.75-70.75) | 45.50 (30.75-66.00) | 0.403 | 48.50 (22.00-87.50) | 54.50 (25.25-84.00) | 0.909 |
| *Coagulation function* | | | | | | |
| APTT, s | 29.30 (22.95-34.15) | 29.30 (26.50-34.70) | 0.518 | 25.60 (23.05-28.45) | 28.15 (23.65-30.75) | 0.196 |
| PT, s | 11.60 (10.90-12.55) | 11.50 (10.80-12.60) | 0.769 | 11.30 (10.80-11.90) | 11.50 (11.00-12.58) | 0.157 |
| D-dimer, mg/L | 0.73 (0.40-1.73) | 1.04 (0.54-3.15) | 0.229 | 0.84 (0.23-2.44) | 0.82 (0.43-1.64) | 0.824 |
|  | Confirmed COVID-19 | |  | Clinically diagnosed COVID-19 | |  |
|  | Insulin | Non-Insulin | *P* value† | Insulin | Non-Insulin | *P* value† |
| *Baseline characteristics and clinical outcomes* | | | | | | |
| No. of Patients | 27 | 18 |  | 44 | 31 |  |
| Age, years | 66.0 (61.0-71.0) | 66.0 (56.0-81.0) | 0.626 | 64.0 (55.3-72.8) | 62.0 (55.0-72.0) | 0.743 |
| Hospital Stay, days | 28.0 (20.0-39.0) | 22.5 (17.0-36.8) | 0.385 | 23.0 (17.0-30.0) | 17.0 (12.0-28.0) | 0.017 |
| In-hospital death | 8 (29.63%) | 2 (11.11%) | 0.272 | 8 (18.18%) | 1 (3.23%) | 0.072 |
| Poor prognosis | 23 (85.19%) | 11 (61.11%) | 0.086 | 35 (79.55%) | 11 (35.48%) | <0.001 |
| *Laboratory findings* | | | | | | |
| *Hematologic, ×109/L* | | | | | | |
| White blood cells | 6.10 (4.56-7.57) | 5.17 (3.68-6.97) | 0.211 | 5.41 (4.37-7.36) | 5.21 (4.74-7.18) | 0.991 |
| Neutrophils | 4.49 (3.39-6.14) | 3.10 (2.56-4.97) | 0.115 | 3.82 (2.96-5.38) | 3.65 (2.74-5.07) | 0.426 |
| Lymphocytes | 0.88 (0.64-1.13) | 0.94 (0.66-1.54) | 0.342 | 0.93 (0.63-1.54) | 1.25 (0.78-1.66) | 0.195 |
| Monocytes | 0.35 (0.26-0.69) | 0.28 (0.17-0.51) | 0.194 | 0.34 (0.26-0.52) | 0.40 (0.30-0.53) | 0.671 |
| Platelets | 170.00 (134.00-208.00) | 183.00 (146.25-224.25) | 0.562 | 183.50 (144.50-230.75) | 201.00 (166.00-266.00) | 0.202 |
| *Biochemical* | | | | | | |
| Hemoglobin, g/L | 123.00 (109.00-142.00) | 122.50 (115.50-133.00) | 0.728 | 125.00 (106.00-135.00) | 123.00 (113.00-133.00) | 0.594 |
| Albumin, g/L | 35.10 (30.90-39.20) | 38.60 (35.08-39.53) | 0.110 | 36.40 (33.15-39.38) | 38.40 (35.20-41.80) | 0.032 |
| Total bilirubin, μmol/L | 10.20 (7.00-13.00) | 8.95 (5.93-16.50) | 0.635 | 8.05 (5.30-11.83) | 10.60 (8.00-14.40) | 0.033 |
| ALT, U/L | 19.30 (12.10-29.10) | 18.35 (15.28-22.23) | 0.746 | 20.10 (11.70-32.03) | 24.50 (13.90-41.10) | 0.189 |
| AST, U/L | 24.30 (17.10-36.50) | 18.15 (13.80-28.45) | 0.151 | 21.45 (15.20-32.10) | 19.60 (13.60-35.50) | 0.897 |
| LDH, U/L | 199.00 (180.00-301.00) | 199.00 (164.25-256.50) | 0.546 | 199.50 (163.00-262.75) | 185.00 (148.75-256.50) | 0.516 |
| Urea, mmol/L | 4.73 (3.58-8.51) | 5.24 (3.78-6.59) | 0.963 | 5.99 (4.04-10.98) | 4.52 (3.70-6.31) | 0.019 |
| Creatinine, μmol/L | 73.50 (57.10-107.40) | 67.10 (46.18-87.85) | 0.372 | 70.40 (54.68-130.28) | 67.30 (54.80-85.40) | 0.442 |
| Creatine kinase, U/L | 93.00 (43.50-185.50) | 61.00 (50.18-126.50) | 0.416 | 84.50 (52.75-127.50) | 65.00 (36.25-109.50) | 0.183 |
| Glucose, mmol/L | 8.93 (5.85-14.16) | 10.46 (7.93-11.46) | 0.643 | 10.97 (8.25-15.52) | 8.27 (5.69-10.89) | 0.001 |
| HbA1c, % | 8.10 (6.60-12.55) | 6.80 (6.70-7.80) | 0.364 | 8.90 (7.50-10.40) | 7.90 (7.13-8.75) | 0.132 |
| HbA1c, mmol/mol | 65.00 (49.00-114.00) | 51.00 (50.00-62.00) | 74.00 (58.00-90.00) | 63.00 (54.00-72.00) |
| *Infection-related indices* | | | | | | |
| CRP, mg/dL | 4.10 (1.06-7.58) | 0.62 (0.15-2.60) | 0.003 | 3.02 (1.23-6.22) | 0.83 (0.12-4.48) | 0.023 |
| IL-6, pg/mL | 10.11 (4.53-90.69) | 7.92 (3.68-22.10) | 0.556 | 5.70 (3.00-49.60) | 3.22 (1.83-11.20) | 0.175 |
| Procalcitonin, ng/mL | 0.15 (0.05-0.35) | 0.04 (0.04-0.06) | 0.001 | 0.07 (0.05-0.15) | 0.06 (0.04-0.09) | 0.081 |
| ESR, mm/h | 45.00 (32.00-78.00) | 33.00 (20.00-58.00) | 0.083 | 65.00 (28.00-93.50) | 42.50 (19.00-76.50) | 0.114 |
| *Coagulation function* | | | | | | |
| APTT, s | 30.20 (26.40-35.30) | 26.60 (23.10-30.50) | 0.065 | 26.70 (24.15-30.55) | 26.60 (22.95-29.65) | 0.731 |
| PT, s | 11.80 (10.90-12.60) | 11.40 (10.90-12.40) | 0.612 | 11.60 (10.93-12.60) | 11.30 (10.90-11.85) | 0.102 |
| D-dimer, mg/L | 0.66 (0.43-1.92) | 0.97 (0.66-2.80) | 0.224 | 1.04 (0.41-1.65) | 0.61 (0.36-2.49) | 0.730 |

Data were n (%) or median (IQR) unless otherwise indicated. Data were collected on admission, except for clinical outcomes. *Metformin users versus non-metformin users. †Insulin users versus non-insulin users. Abbreviations: ALT, Alanine aminotransferase; AST, Aspartate aminotransferase; LDH, Lactate dehydrogenase; IL-6, Interleukin-6; CRP, C-reactive protein; ESR, Erythrocyte sedimentation rate; APTT, Activated partial thromboplastin time; PT, Prothrombin time.

**Supplementary Table 5. Clinical characteristics, outcomes and laboratory findings according to α-glycosidase/ secretagogues/ DPP4 inhibitor medication.**

|  | COVID-19 + Diabetes (n=120) * | | | | | | | | |
| --- | --- | --- | --- | --- | --- | --- | --- | --- | --- |
|  | α-glycosidase | Non-α-glycosidase | P† value | Secretagogues | Non-Secretagogues | P‡ value | DPP4 inhibitor | Non-DPP4 inhibitor | P§ value |
| *Baseline characteristics and clinical outcomes* | | | | | | | | | |
| Age, years | 66.0  (56.5-73.0) | 65.0  (56.0-72.0) | 0.570 | 66.0  (60.0-72.5) | 64.0  (55.0-73.0) | 0.351 | 66.0  (56.0-73.0) | 65.0  (57.0-72.0) | 0.664 |
| Hospital Stay, days | 24.0  (17.0-33.0) | 21.0  (15.0-29.0) | 0.212 | 24.0  (18.5-32.5) | 22.0  (16.0-33.0) | 0.415 | 22.0  (19.3-29.0) | 23.0  (16.0-33.8) | 0.827 |
| In-hospital death | 11  (15.94%) | 8  (15.69%) | 1.000 | 7  (13.20%) | 12  (17.91%) | 0.616 | 5  (25.00%) | 14  (14.00%) | 0.310 |
| Poor prognosis | 45 (65.22%) | 35 (68.63%) | 0.845 | 37 (69.81%) | 43 (64.18%) | 0.563 | 15 (75.00%) | 65 (65.00%) | 0.447 |
| *Laboratory findings* | | | | | | | | | |
| *Hematologic, ×109/L* | | | | | | | | | |
| White blood cells | 5.60  (4.19-7.12) | 5.30  (4.79-7.38) | 0.554 | 5.12  (3.91-6.7) | 5.95  (4.85-7.47) | 0.049 | 5.59  (3.64-7.04) | 5.50  (4.61-7.36) | 0.455 |
| Neutrophils | 3.72  (2.82-5.28) | 3.99  (2.79-5.69) | 0.659 | 3.28  (2.61-4.98) | 4.29  (3.20-5.83) | 0.022 | 3.34  (2.56-5.28) | 3.92  (2.87-5.54) | 0.329 |
| Lymphocytes | 0.96  (0.67-1.42) | 1.02  (0.64-1.54) | 0.824 | 1.01  (0.73-1.38) | 0.94  (0.62-1.52) | 0.642 | 1.12  (0.75-1.20) | 0.92  (0.65-1.53) | 0.642 |
| Monocytes | 0.35  (0.26-0.52) | 0.35  (0.24-0.59) | 0.661 | 0.33  (0.25-0.51) | 0.38  (0.26-0.58) | 0.497 | 0.41  (0.28-0.53) | 0.34  (0.25-0.54) | 0.588 |
| Platelets | 183.00  (154.00-227.50) | 183.00  (141.00-238.00) | 0.764 | 188.00  (137.50-226.00) | 183.00  (146.00-235.00) | 0.588 | 141.50  (127.50-221.50) | 183.50  (152.75-234.00) | 0.081 |
| *Biochemical* | | | | | | | | | |
| Hemoglobin, g/L | 123.00  (113.50-131.00) | 125.00  (106.00-140.00) | 0.669 | 123.00  (113.50-133.00) | 124.00  (110.00-136.00) | 0.947 | 123.50  (114.50-137.50) | 123.50  (112.00-134.00) | 0.733 |
| Albumin, g/L | 36.90  (33.00-40.15) | 37.20  (34.50-40.30) | 0.483 | 38.30  (34.20-40.40) | 35.80  (33.80-39.60) | 0.443 | 38.65  (34.20-41.23) | 37.00  (33.95-40.05) | 0.686 |
| Total bilirubin, μmol/L | 9.20  (7.10-13.95) | 9.60  (5.60-13.30) | 0.509 | 9.40  (7.10-14.10) | 9.20  (6.20-13.30) | 0.549 | 9.05  (6.00-12.83) | 9.35  (6.45-13.80) | 0.803 |
| ALT, U/L | 19.90  (12.40-32.95) | 18.60  (13.00-25.7) | 0.363 | 19.70  (13.80-31.25) | 19.30  (12.00-32.60) | 0.610 | 19.80  (13.75-25.98) | 19.30  (12.15-32.03) | 0.894 |
| AST, U/L | 21.70  (15.80-35.65) | 19.6  (15.00-29.80) | 0.322 | 19.60  (13.80-30.70) | 22.00  (15.60-33.00) | 0.487 | 22.65  (14.55-36.45) | 20.65  (15.20-32.13) | 0.680 |
| LDH, U/L | 198.00  (171.00-262.00) | 199.50  (155.50-253.75) | 0.684 | 192.00  (164.25-213.25) | 209.00  (160.00-300.00) | 0.205 | 191.50  (172.50-205.75) | 201.00  (161.00-266.00) | 0.308 |
| Urea, mmol/L | 4.81  (3.77-6.95) | 5.80  (3.72-8.00) | 0.345 | 5.21  (3.82-6.85) | 5.17  (3.72-8.29) | 0.713 | 5.36  (3.97-8.13) | 5.13  (3.72-7.19) | 0.549 |
| Creatinine, μmol/L | 69.90  (54.70-86.25) | 71.00  (53.70-128.50) | 0.488 | 69.90  (52.10-89.70) | 70.30  (55.50-93.50) | 0.700 | 83.50  (64.33-101.95) | 68.05  (53.75-86.38) | 0.081 |
| Creatine kinase, U/L | 73.00  (40.00-138.00) | 90.30  (51.25-133.95) | 0.214 | 61.00  (40.33-99.00) | 100.00  (61.00-176.00) | 0.001 | 68.00  (44.43-92.9) | 76.00  (49.00-143.50) | 0.197 |
| Glucose, mmol/L | 9.80  (6.68-13.09) | 8.98  (6.88-11.52) | 0.435 | 10.43  (7.77-12.98) | 8.88  (6.66-12.23) | 0.242 | 10.14  (7.71-13.31) | 9.55  (6.71-12.22) | 0.655 |
| HbA1c, % | 8.35  (7.38-10.25) | 7.90  (6.90-9.10) | 0.403 | 8.30  (7.40-9.50) | 7.70  (7.10-10.43) | 0.825 | 7.75  (6.80-10.55) | 8.30  (7.30-9.50) | 0.599 |
| HbA1c, (mmol/mol) | 68.00  (57.00-89.00) | 63.00  (52.00-76.00) | 67.00  (57.00-80.00) | 61.00  (54.00-90.00) | 61.00  (51.00-92.00) | 67.00  (56.00-80.00) |
| *Infection-related indices* | | | | | | | | | |
| CRP, mg/dL | 2.46  (0.48-4.89) | 2.82  (0.27-5.36) | 0.866 | 1.33  (0.16-3.70) | 3.45  (0.91-6.42) | 0.002 | 1.71  (0.13-3.94) | 2.77  (0.53-5.36) | 0.179 |
| IL-6, pg/mL | 9.01  (3.07-37.87) | 5.15  (3.22-32.62) | 0.865 | 3.37  (2.12-11.93) | 10.11  (4.13-66.67) | 0.032 | 7.44  (1.62-27.71) | 7.42  (3.25-39.85) | 0.651 |
| Procalcitonin, ng/mL | 0.07  (0.04-0.11) | 0.07  (0.04-0.22) | 0.427 | 0.06  (0.04-0.11) | 0.08  (0.05-0.21) | 0.071 | 0.06  (0.04-0.16) | 0.07  (0.04-0.14) | 0.963 |
| ESR, mm/h | 46.00  (25.00-72.5.00) | 47.00  (24.00-90.00) | 0.601 | 60.00  (30.00-83.00) | 45.00  (24.00-72.00) | 0.239 | 33.00  (21.50-96.50) | 46.00  (25.00-75.00) | 0.923 |
| *Coagulation function* | | | | | | | | | |
| APTT, s | 27.65  (24.13-32.9) | 28.00  (23.45-30.85) | 0.695 | 27.00  (23.3-31.30) | 28.15  (24.15-31.75) | 0.460 | 29.20  (25.08-34.25) | 27.60  (23.50-31.15) | 0.341 |
| PT, s | 11.50  (10.90-12.30) | 11.50  (10.95-12.50) | 0.584 | 11.30  (10.90-12.30) | 11.60  (10.98-12.30) | 0.293 | 11.45  (10.48-12.58) | 11.50  (10.95-12.30) | 0.635 |
| D-dimer, mg/L | 0.84  (0.45-1.98) | 0.71  (0.39-2.35) | 0.710 | 0.77  (0.42-2.28) | 0.98  (0.44-2.11) | 0.696 | 0.75  (0.37-1.00) | 0.94  (0.43-2.34) | 0.241 |

Data were n (%) or median (IQR) unless otherwise indicated. Data were collected on admission, except for clinical outcomes. *After excluding 16 diabetic patients without available history of glucose lowering medication, 120 diabetic patients with COVID-19 were included in this analysis. †α-glycosidase users versus non-α-glycosidase users. ‡Secretagogues users versus non-secretagogues users. §DPP4 inhibitor users versus non-DPP4 inhibitor users. Abbreviations: ALT, Alanine aminotransferase; AST, Aspartate aminotransferase; LDH, Lactate dehydrogenase; IL-6, Interleukin-6; CRP, C-reactive protein; ESR, Erythrocyte sedimentation rate; APTT, Activated partial thromboplastin time; PT, Prothrombin time

**Supplementary Table 6. Multivariable logistic regression of risk factors associated with in-hospital death and poor prognosis for diabetic patients with COVID-19 according to different medication usage**

|  | Risk factors associated with in-hospital death | | Risk factors associated with poor prognosis | |
| --- | --- | --- | --- | --- |
| Multivariable OR (95% CI) | *P* value | Multivariable OR (95% CI) | *P* value |
| *Model 1* | | | | |
| Usage of metformin (Yes vs NO) | 0.62 (0.17, 2.20) | 0.456 | 2.49 (0.92, 6.76) | 0.074 |
| Age, years | 1.06 (1.01, 1.12) | 0.021 | 1.02 (0.99, 1.06) | 0.180 |
| Albumin, g/L | 1.02 (0.90, 1.17) | 0.734 | 0.90 (0.81, 1.00) | 0.044 |
| Creatinine, μmol/L | 1.00 (1.00, 1.01) | 0.052 | 1.01 (1.00, 1.02) | 0.125 |
| CRP, mg/dL | 1.13 (1.01, 1.26) | 0.039 | 1.17 (1.01, 1.36) | 0.035 |
| Glucose, mmol/L | 1.11 (1.00, 1.23) | 0.061 | 1.06 (0.96, 1.17) | 0.270 |
| *Model 2* | | | | |
| Usage of insulin (Yes vs NO) | 2.99 (0.67, 13.30) | 0.149 | 3.58 (1.37, 9.35) | 0.009 |
| Age, years | 1.07 (1.02, 1.13) | 0.010 | 1.03 (0.99, 1.07) | 0.152 |
| Albumin, g/L | 1.04 (0.91, 1.19) | 0.573 | 0.94 (0.85, 1.05) | 0.288 |
| Creatinine, μmol/L | 1.00 (1.00, 1.01) | 0.096 | 1.01 (1.00, 1.02) | 0.175 |
| CRP, mg/dL | 1.10 (0.98, 1.23) | 0.114 | 1.11 (0.96, 1.28) | 0.150 |
| Glucose, mmol/L | 1.09 (0.98, 1.21) | 0.113 | 1.03 (0.92, 1.14) | 0.631 |
| *Model 3* | | | | |
| Usage of α-glycosidase (Yes vs NO) | 0.99 (0.31, 3.14) | 0.985 | 0.83 (0.34, 2.01) | 0.680 |
| Age, years | 1.07 (1.01, 1.13) | 0.013 | 1.02 (0.99, 1.06) | 0.235 |
| Albumin, g/L | 1.02 (0.90, 1.17) | 0.754 | 0.92 (0.83, 1.02) | 0.101 |
| Creatinine, μmol/L | 1.00 (1.00, 1.01) | 0.058 | 1.01 (1.00, 1.02) | 0.135 |
| CRP, mg/dL | 1.13 (1.01, 1.26) | 0.035 | 1.16 (1.01, 1.33) | 0.042 |
| Glucose, mmol/L | 1.11 (1.00, 1.23) | 0.056 | 1.06 (0.96, 1.17) | 0.242 |
| *Model 4* | | | | |
| Usage of secretagogues (Yes vs NO) | 0.68 (0.21, 2.16) | 0.508 | 2.11 (0.82, 5.43) | 0.121 |
| Age, years | 1.07 (1.02, 1.13) | 0.011 | 1.02 (0.98, 1.05) | 0.364 |
| Albumin, g/L | 1.02 (0.90, 1.17) | 0.748 | 0.91 (0.82, 1.01) | 0.075 |
| Creatinine, μmol/L | 1.00 (1.00, 1.01) | 0.056 | 1.01 (1.00, 1.02) | 0.116 |
| CRP, mg/dL | 1.12 (1.00, 1.25) | 0.060 | 1.20 (1.03, 1.4) | 0.023 |
| Glucose, mmol/L | 1.11 (1.00, 1.24) | 0.047 | 1.04 (0.94, 1.16) | 0.411 |
| *Model 5* | | | | |
| Usage of DPP4 inhibitor (Yes vs NO) | 1.48 (0.40, 5.53) | 0.561 | 1.81 (0.51, 6.37) | 0.356 |
| Age, years | 1.07 (1.01, 1.12) | 0.015 | 1.02 (0.98, 1.06) | 0.279 |
| Albumin, g/L | 1.02 (0.90, 1.17) | 0.741 | 0.91 (0.82, 1.01) | 0.083 |
| Creatinine, μmol/L | 1.00 (1.00, 1.01) | 0.055 | 1.01 (1.00, 1.02) | 0.129 |
| CRP, mg/dL | 1.13 (1.01, 1.26) | 0.034 | 1.17 (1.01, 1.35) | 0.033 |
| Glucose, mmol/L | 1.10 (0.99, 1.23) | 0.073 | 1.06 (0.96, 1.17) | 0.272 |

Data were odds ratio (95% confidence intervals). Model 1,2,3,4,5: In each model, five of the same variables (Age, albumin, creatinine, glucose and CRP) and different usage of medication (metformin, insulin, α-glycosidase, secretagogues or DPP4 inhibitor) were chosen for multivariable analysis of diabetic cases with COVID-19, respectively. *P* < 0.05 were considered significant. Abbreviations: OR, Odds ratio; CI, Confidence interval; CRP, C-reactive protein.

**Supplementary Table 7. Clinical characteristics, outcomes and laboratory findings according to ACEI/ARB medication**

|  | COVID-19 + Diabetes + Hypertension | | |
| --- | --- | --- | --- |
|  | ACEI/ARB | Non-ACEI/ARB | *P* value |
| *Baseline characteristics and clinical outcomes* | | | |
| No. of Patients | 32 | 39 |  |
| Age, years | 67.5 (61.3-73.0) | 67.0 (61.0-76.0) | 0.890 |
| Hospital Stay, days | 20.5 (16.0-34.5) | 24.0 (15.0-33.0) | 0.849 |
| In-hospital death | 4 (12.50%) | 10 (25.64%) | 0.233 |
| *Laboratory findings* | | | |
| *Hematologic, ×109/L* | | | |
| White blood cells | 6.00 (4.30-7.47) | 5.52 (4.79-7.27) | 0.813 |
| Neutrophils | 3.96 (2.78-5.79) | 4.47 (3.20-5.34) | 0.764 |
| Lymphocytes | 0.93 (0.67-1.33) | 0.98 (0.66-1.73) | 0.459 |
| Monocytes | 0.37 (0.27-0.58) | 0.33 (0.25-0.47) | 0.452 |
| Platelets | 181.00 (141.25-252.50) | 183.00 (152.00-225.00) | 0.995 |
| *Biochemical* | | | |
| Hemoglobin, g/L | 126.50 (112.50-145.75) | 118.00 (106.00-126.00) | 0.006 |
| Albumin, g/L | 36.20 (32.73-41.33) | 37.05 (33.68-39.23) | 0.944 |
| Total bilirubin, μmol/L | 9.60 (7.20-14.05) | 9.25 (5.58-11.60) | 0.498 |
| ALT, U/L | 20.55 (13.15-34.95) | 21.25 (13.10-28.05) | 0.911 |
| AST, U/L | 25.50 (17.58-36.45) | 21.80 (14.60-35.08) | 0.337 |
| LDH, U/L | 237.00 (175.00-321.00) | 202.00 (164.00-279.25) | 0.311 |
| Urea, mmol/L | 5.24 (3.72-7.19) | 6.20 (4.10-11.62) | 0.127 |
| Creatinine, μmol/L | 72.25 (59.23-90.95) | 70.40 (55.60-151.60) | 0.591 |
| Creatine kinase, U/L | 100.0 (55.0-186.0) | 84.50 (49.0-138.9) | 0.370 |
| Glucose, mmol/L | 10.51 (8.76-12.29) | 8.19 (5.94-11.96) | 0.119 |
| HbA1c, % | 8.20 (7.40-9.20) | 7.50 (6.75-9.10) | 0.182 |
| HbA1c, mmol/mol | 66.00 (55.00-77.00) | 58.00 (51.00-76.00) |
| Infection-related indices | | | |
| CRP, mg/dL | 3.45 (0.55-5.46) | 1.47 (0.36-6.22) | 0.525 |
| IL-6, pg/mL | 10.91 (2.18-27.56) | 5.15 (3.10-12.98) | 0.775 |
| Procalcitonin, ng/mL | 0.08 (0.05-0.19) | 0.08 (0.05-0.21) | 0.873 |
| ESR, mm/h | 45.00 (20.00-62.00) | 60.00 (33.00-85.00) | 0.118 |
| *Coagulation function* | | | |
| APTT, s | 29.20 (24.80-31.90) | 26.00 (23.65-32.40) | 0.323 |
| PT, s | 11.40 (10.70-12.30) | 11.90 (11.18-12.60) | 0.057 |
| D-dimer, mg/L | 0.90 (0.56-1.42) | 1.22 (0.45-2.49) | 0.453 |
| *Initial Blood pressure, mmHg* | | | |
| Diastolic pressure | 80.00 (72.00-90.00) | 78.00 (67.00-89.00) | 0.232 |
| Systolic Pressure | 140.00 (129.00-155.00) | 140.00 (130.00-135.00) | 0.729 |

Data were n (%) or median (IQR) unless otherwise indicated. Data were collected on admission, except for clinical outcomes. *After excluding diabetic patients without available history of blood pressure lowering medication or without hypertension, 71 diabetic patients with COVID-19 and comorbid hypertension were included in this analysis. 34 of the 71 patients had ACEI/ARB medication. Abbreviations: ACEI/ARB, ACE inhibitors or angiotensin II type-I receptor blockers; ALT, Alanine aminotransferase; AST, Aspartate aminotransferase; LDH, Lactate dehydrogenase; IL-6, Interleukin-6; CRP, C-reactive protein; ESR, Erythrocyte sedimentation rate; APTT, Activated partial thromboplastin time; PT, Prothrombin
